# Supplementary material
Source: PubMed Central journal article supplement (PMC8065255)
Supplement: NIHMS1689203-supplement-Supplementary_figure.pdf [file NIHMS1689203-supplement-Supplementary_figure.pdf]

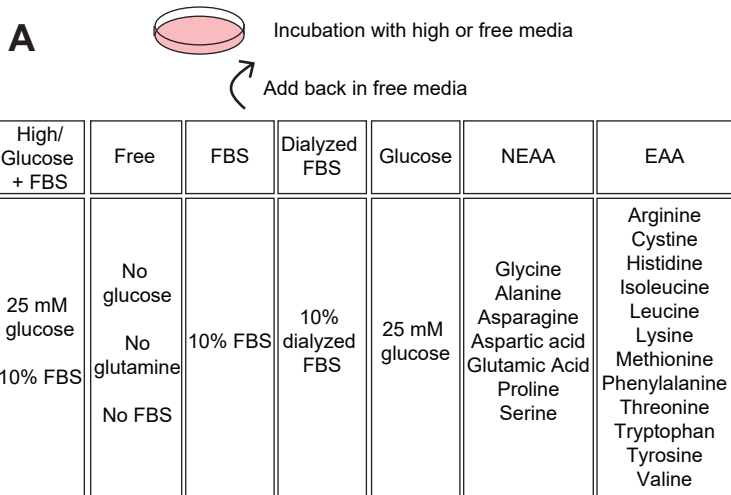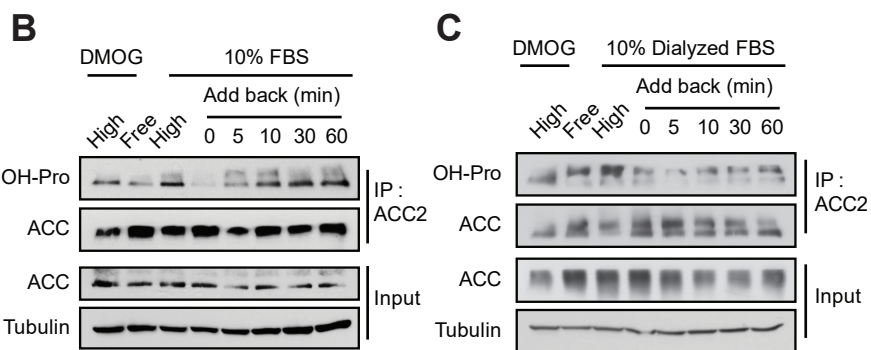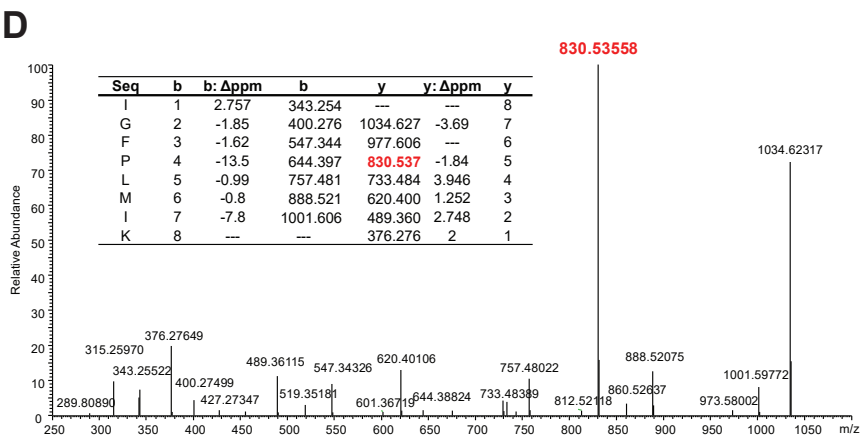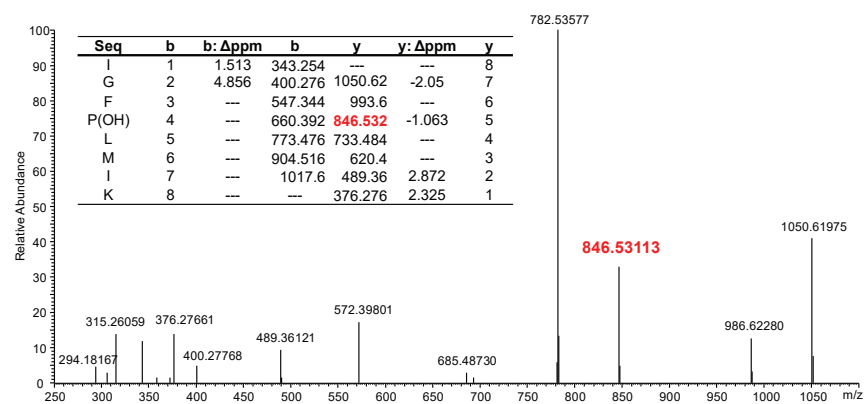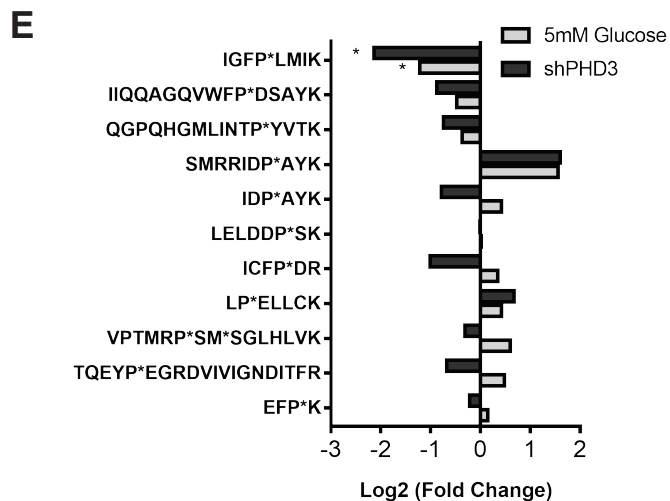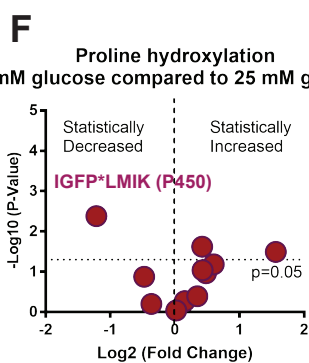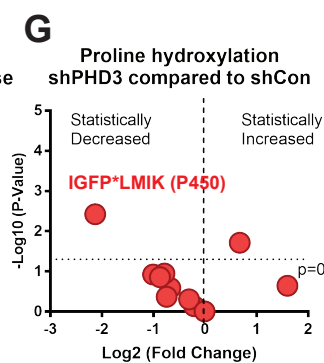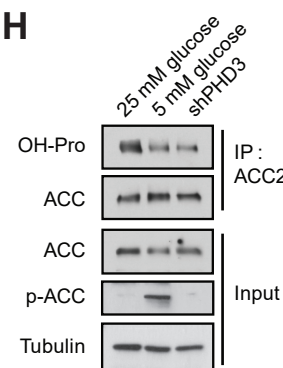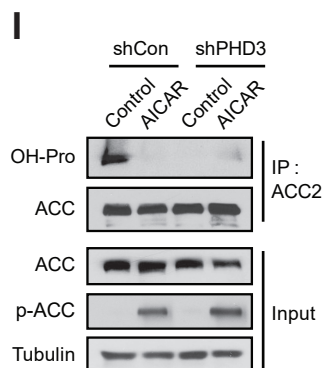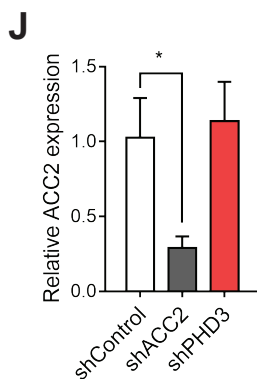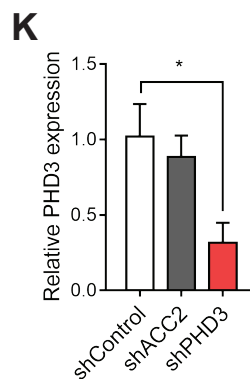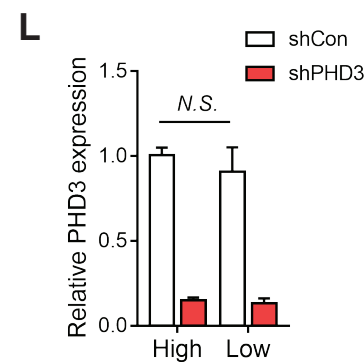

**A**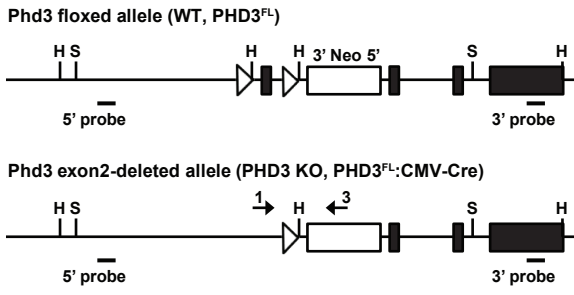**B**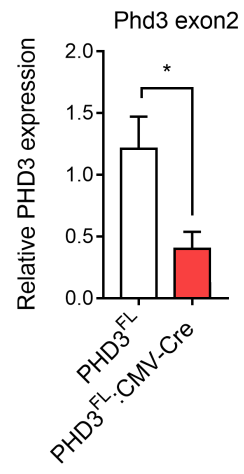**C**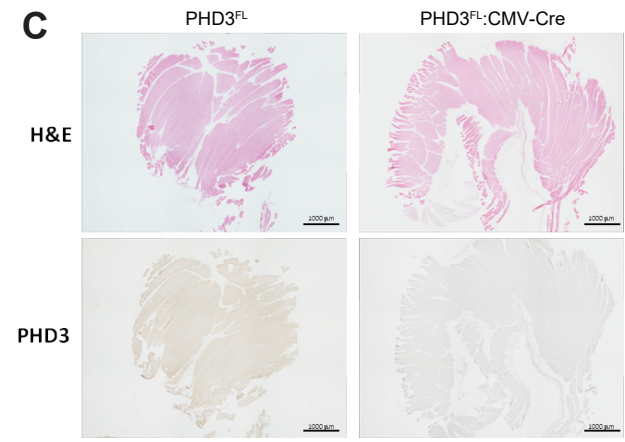

**A**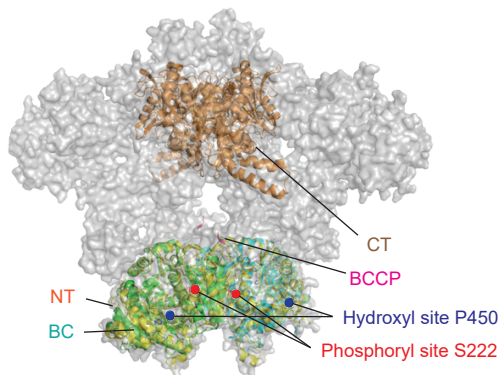**B**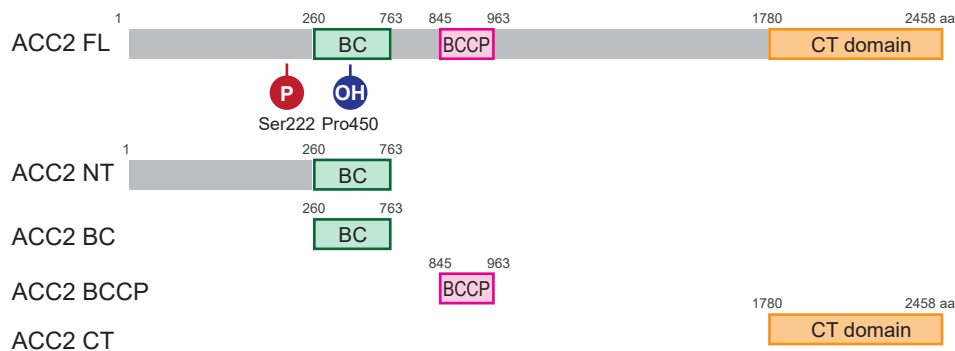**C**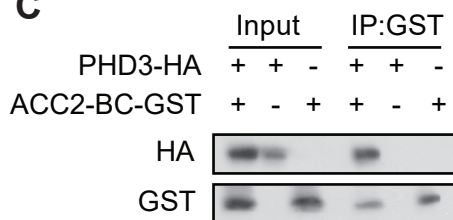**D**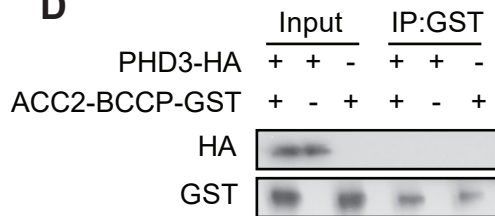**E**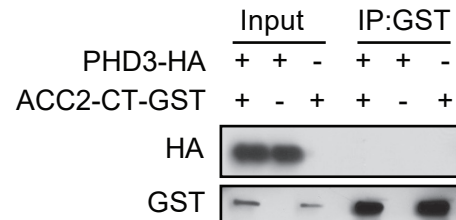**F**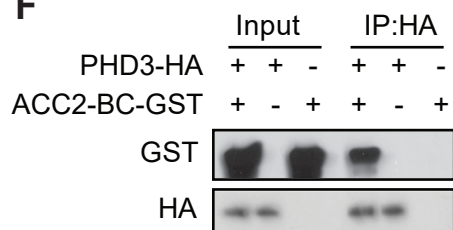**G**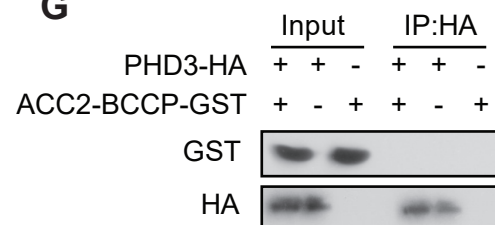**H**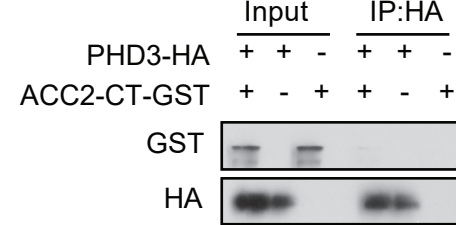**I**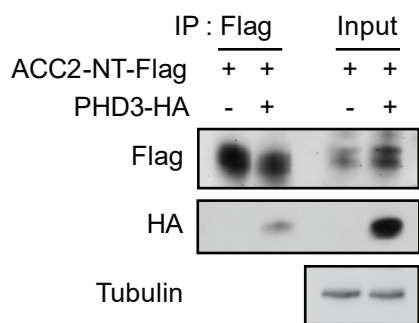**J**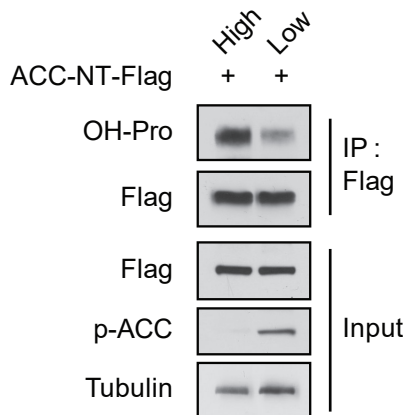**K**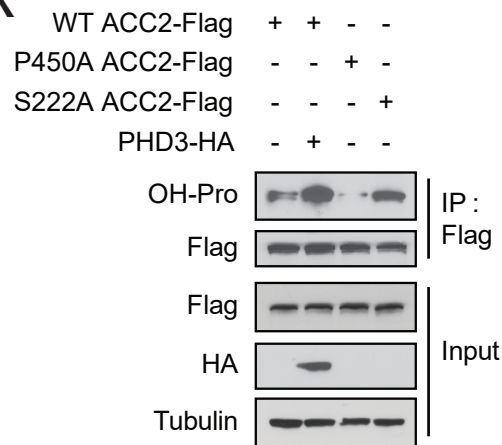**L**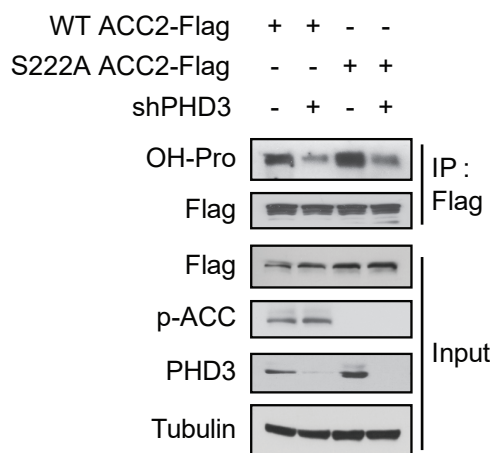

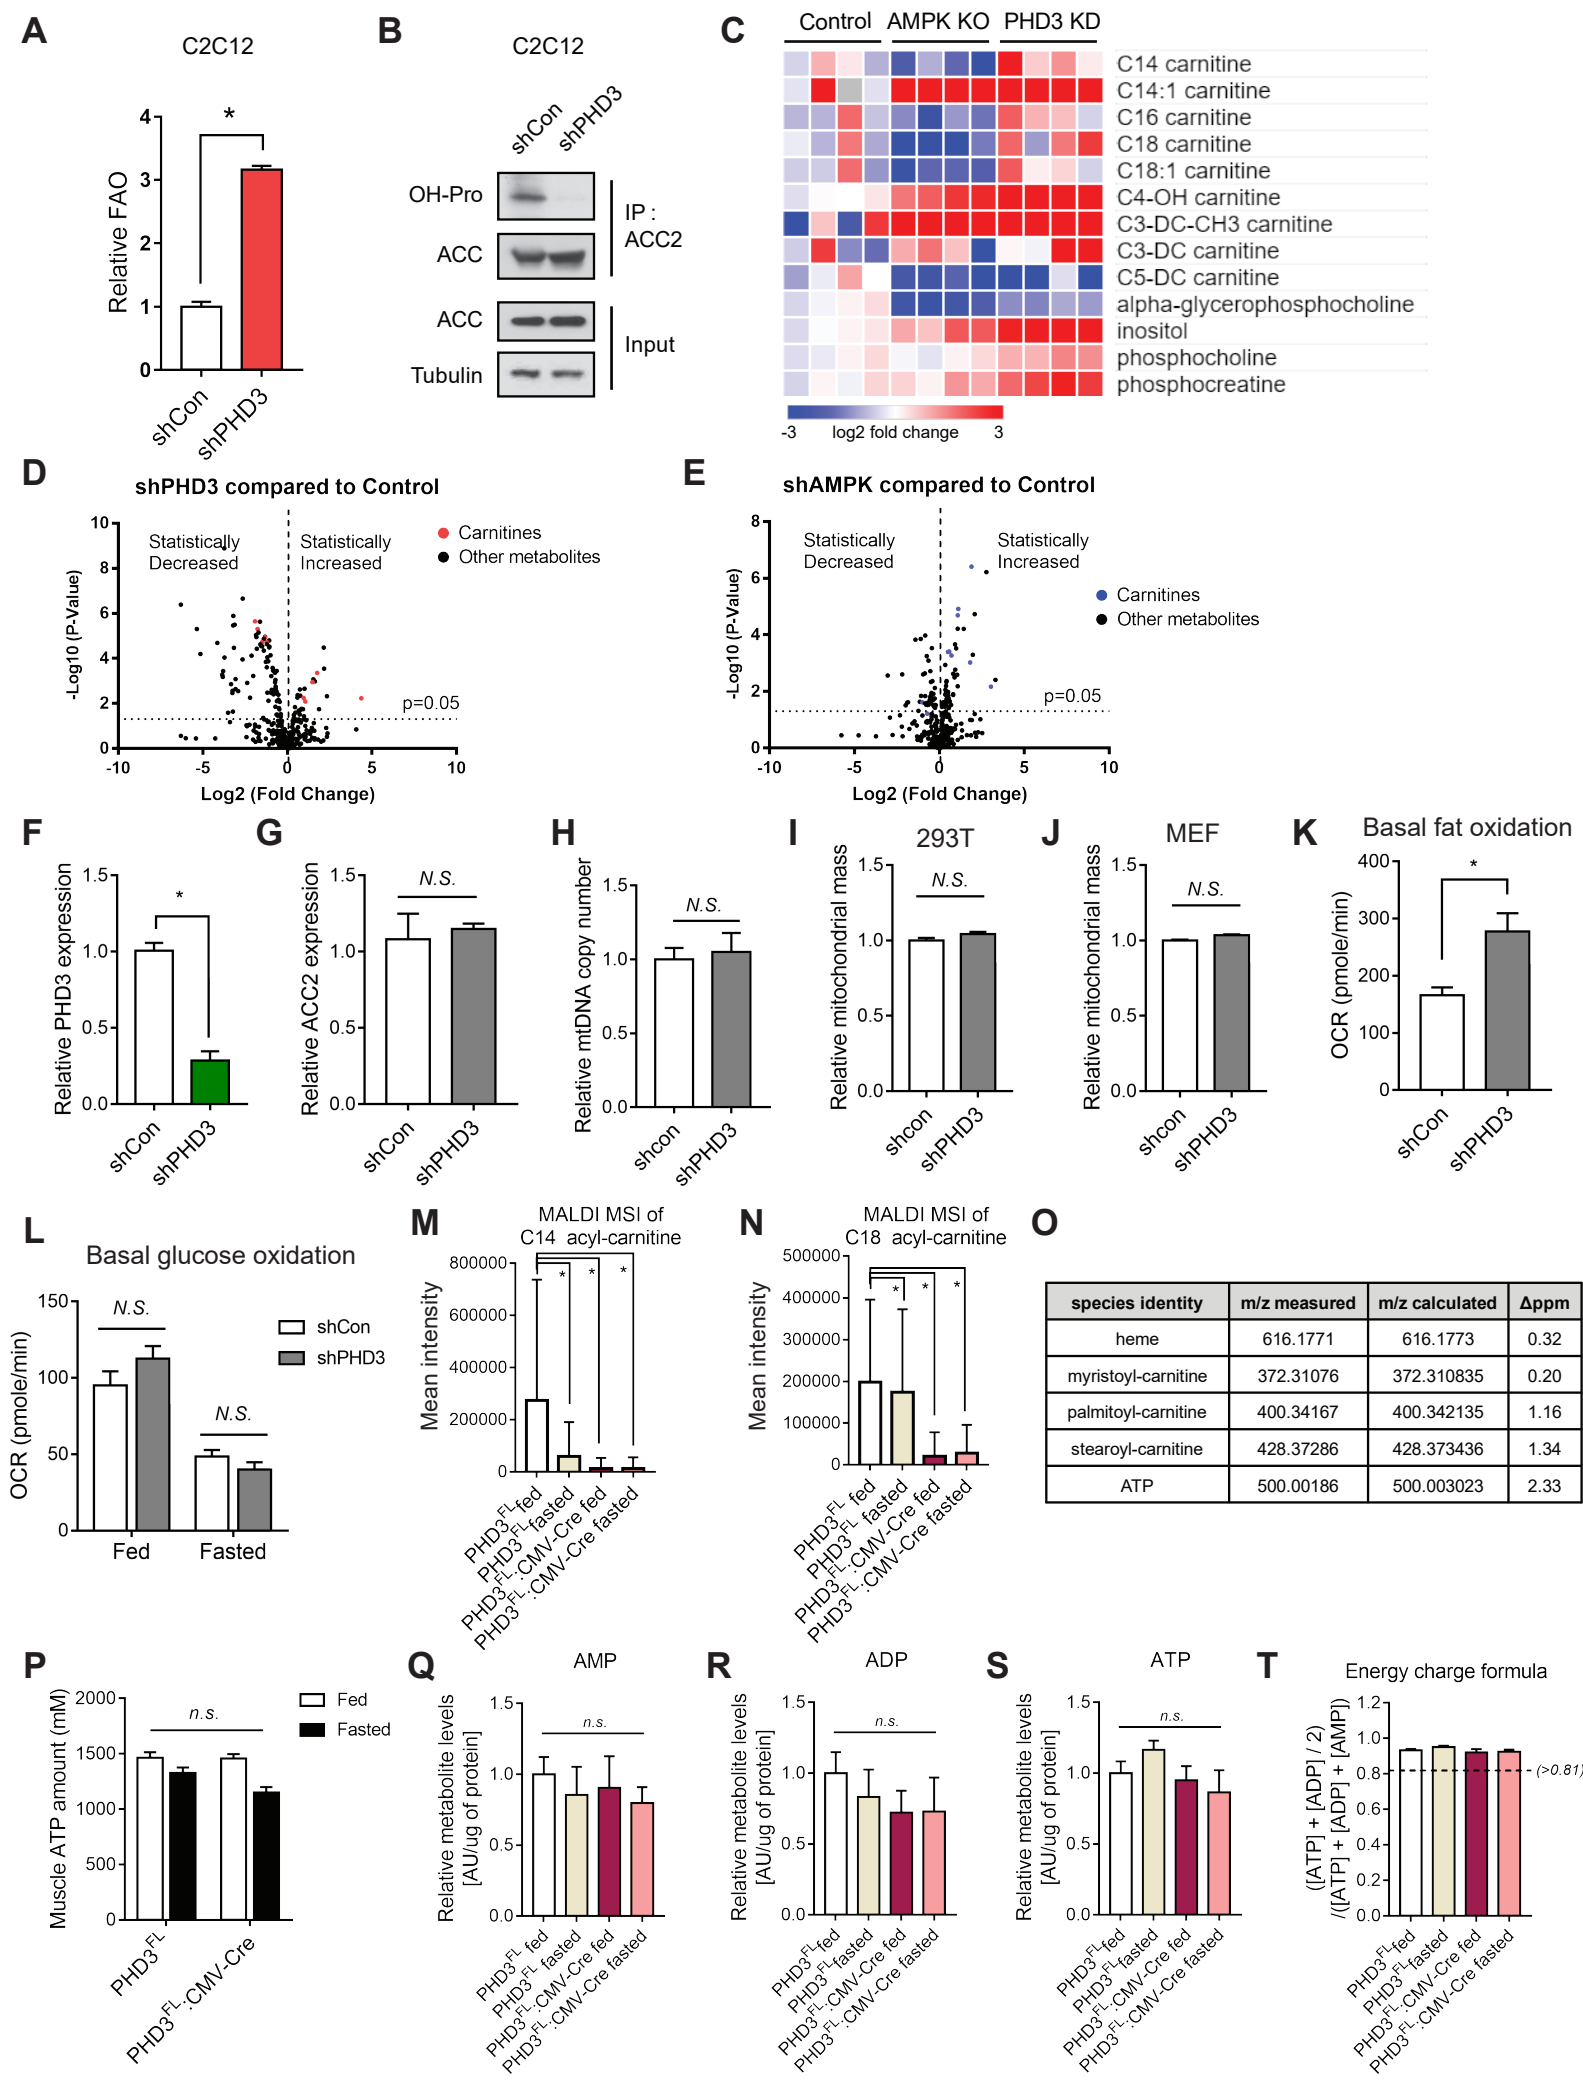

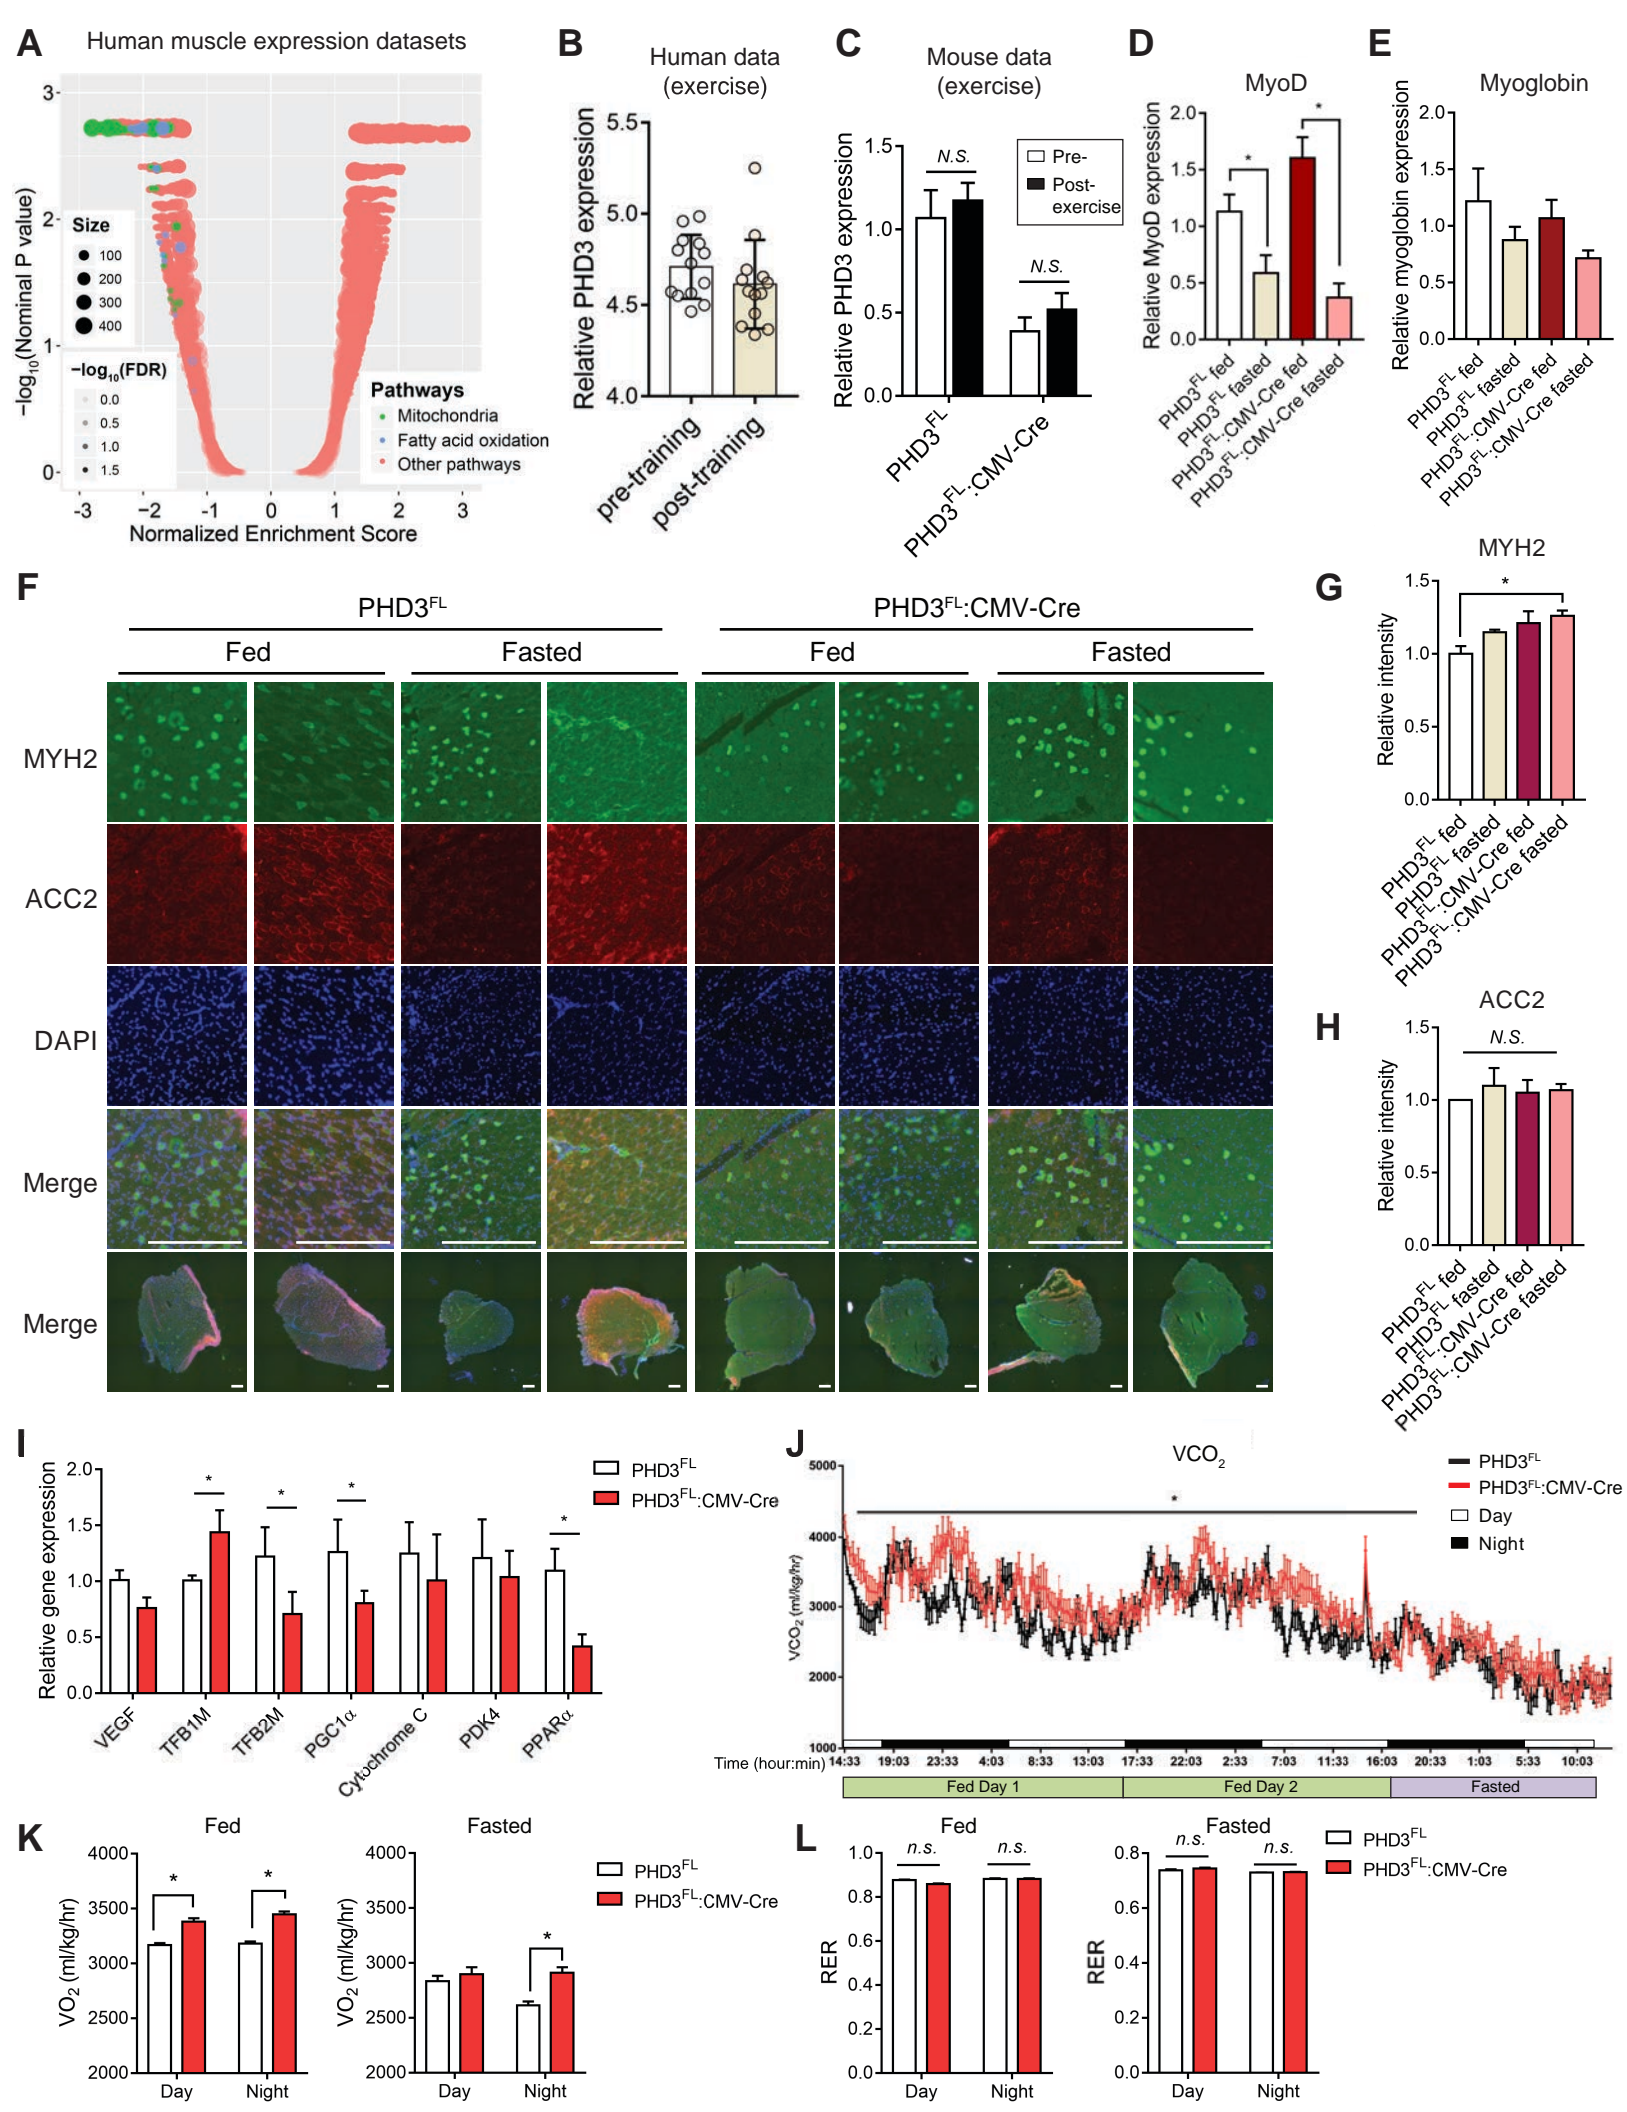

**A**

PHD3<sup>FL</sup> or  
PHD3<sup>FL</sup>:CMV-Cre

|               |   |   |    |    |    |    |    |    |    |    |    |    |    |    |    |
|---------------|---|---|----|----|----|----|----|----|----|----|----|----|----|----|----|
| Time (min)    | 0 | 5 | 10 | 15 | 20 | 25 | 30 | 35 | 40 | 45 | 50 | 55 | 60 | 65 | 70 |
| Speed (m/min) | 0 | 0 | 0  | 0  | 5  | 10 | 15 | 20 | 20 | 20 | 20 | 20 | 20 | 20 | 20 |
| Incline       | 0 | 0 | 0  | 0  | 0  | 0  | 0  | 0  | 5  | 10 | 15 | 20 | 25 | 25 | 25 |

**B**VO<sub>2</sub>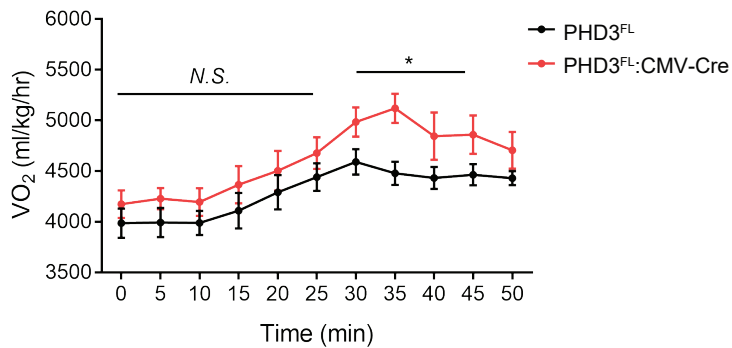**C**VCO<sub>2</sub>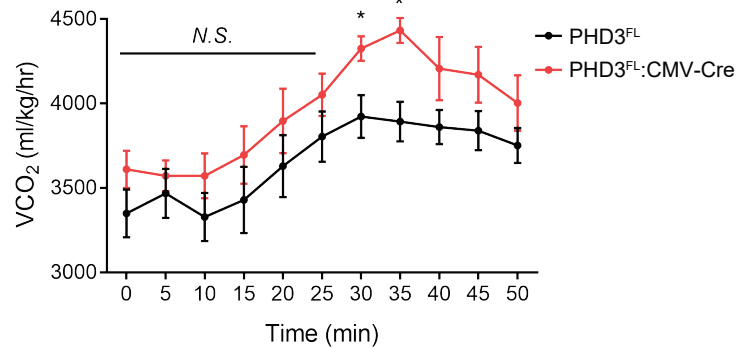**D**

RER

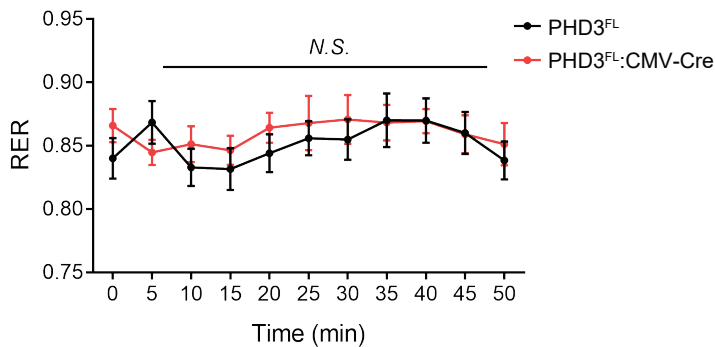**E**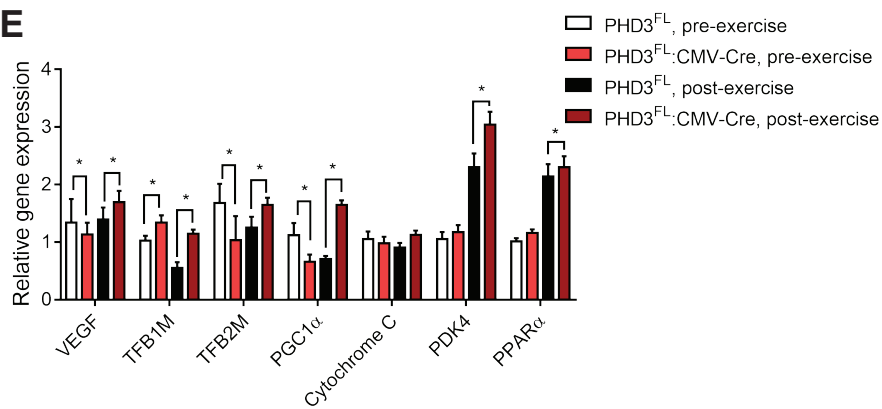**F**

Phd3 exon2

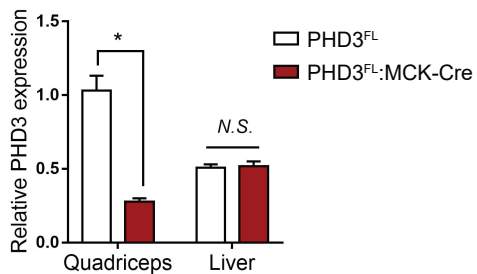**G**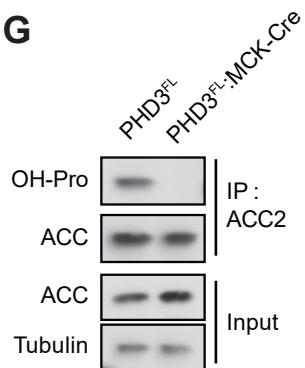

Supplement Table 1. primer sequences, Related to Figure2, Figure 5 and Figure 6.

| RT-PCR Primers               |                          |
|------------------------------|--------------------------|
| Name                         | Sequence                 |
| human PHD3 Forward           | ATACTACGTC AAGGAGAGGT    |
| human PHD3 Reverse           | TCAGCATCAAAGTACCAGA      |
| human B2M Forward            | AGATGAGTATGCCTGCCGTGTGAA |
| human B2M Reverse            | TGCTGCTTACATGTCTCGATCCCA |
| human ACC2 Forward           | CTCTGACCATGTTTCGTTCTC    |
| human ACC2 Reverse           | ATCTTCATCACCTCCATCTC     |
| mouse PHD3 Forward           | CAGACCGCAGGAATCCACAT     |
| mouse PHD3 Reverse           | TTCAGCATCGAAGTACCAGACAGT |
| mouse ACC2 Forward           | TTCATGGACAGTGGCTTCTC     |
| mouse ACC2 Reverse           | GCACGCCTTACTGAAGAGAAG    |
| mouse VEGF Forward           | AAAAACGAAAAGCGCAAGAAA    |
| mouse VEGF Reverse           | TTTCTCCGCTCTGAACAAGG     |
| mouse TFB1 Forward           | AATTTCTCTGGACTTGAGG      |
| mouse TFB1 Reverse           | AGAGAGCATCTGTAACCCTGG    |
| mouse TFB2 Forward           | GTTGGAATGACTCCTCGTAGG    |
| mouse TFB2 Reverse           | CATTCTAGCAGCTGTGTCTCC    |
| mouse PGC-1 $\alpha$ Forward | CCCTGCCATTGTTAAGACC      |
| mouse PGC-1 $\alpha$ Reverse | TGCTGCTGTTCTGTTTTTC      |
| mouse Cytochrome C Forward   | CACGCTTTACCTTCGTCTC      |
| mouse Cytochrome C Reverse   | CTCATTTCCCTGCCATTCTCTA   |
| mouse PDK4 Forward           | CCGCTGTCCATGAAGCA        |
| mouse PDK4 Reverse           | GCAGAAAAGCAAAGGACGTT     |
| mouse PPAR $\alpha$ Forward  | AGAGCCCATCTGTCTCTC       |
| mouse PPAR $\alpha$ Reverse  | ACTGGTAGTCTGCAAAACCAAA   |
| mouse $\beta$ -Actin Forward | AGCCATGTACGTAGCCATCC     |
| mouse $\beta$ -Actin Reverse | CTCTCAGCTGTGGTGGTGAA     |

| Primers for MT-DNA Copy Number |                               |
|--------------------------------|-------------------------------|
| Name                           | Sequence                      |
| MT-CO2 Forward                 | CCCCACATTAGGCTTAAAAACAGAT     |
| MT-CO2 Reverse                 | TATACCCCCGGTGGTGTAGCGGT       |
| D-Loop Forward                 | TATCTTTTGGCGGTATGCACTTTTAACAG |
| D-Loop Reverse                 | TGATGAGATTAGTAGTATGGGAGTGG    |
| $\beta$ -Globin Forward        | GTGCACCTGACTCCTGAGGAGA        |
| $\beta$ -Globin Reverse        | CCTTGATACCAACCTGCCACG         |
| $\beta$ -Actin Forward         | TCACCCACACTGTGCCATCTACGA      |
| $\beta$ -Actin Reverse         | CAGCGGAACCGCTCATTGCCAATGG     |

| Primers for cloning |                                         |
|---------------------|-----------------------------------------|
| Name                | Sequence                                |
| ACC2 P450A Forward  | AATTGGTTTTgcaTTGATGATCAAAG              |
| ACC2 P450A Reverse  | CTTTCTGCTGCCTCCAAG                      |
| ACC2 S222A Forward  | GCCGAGCATGgcgGGACTCCACC                 |
| ACC2 S222A Reverse  | CTCATAGTGGGGACGCGGGTC                   |
| ACC2 S222E Forward  | GCCGAGCATGgagGGACTCCACC                 |
| ACC2 S222E Reverse  | CTCATAGTGGGGACGCGGGTC                   |
| ACC2 BC Forward     | CTGGGATCCCCGGAATTCGATGATCTGCAGCAGGGAAAA |
| ACC2 BC Reverse     | CGTCAGTCAGTCACGATGCATGGCGATCTGTAGCTGG   |
| ACC2 BCCP Forward   | CTGGGATCCCCGGAATTCACAGTCCTGAGATCCCCC    |
| ACC2 BCCP Reverse   | CGTCAGTCAGTCACGATGCAGCTGGCCACCAC        |
| ACC2 CT Forward     | CTGGGATCCCCGGAATTCCTTCTGTACCTGCGGGCA    |
| ACC2 CT Reverse     | CGTCAGTCAGTCACGATGGCCGGGTGTGTATGGAA     |
| ACC2 NT Forward     | CCGGAATTCAAGGGCAGCCGGGCCAGCTTG          |
| ACC2 NT Reverse     | CGTCAGTCAGTCACGATGCATGGCGATCTGTAGCTGG   |

| Primers for shRNA knockdowns |                                                            |
|------------------------------|------------------------------------------------------------|
| Name                         | Sequence                                                   |
| Control shRNA Forward        | CCGGCCGTCATAGCGATAACGAGTTCTCGAGAACTCGTTATCGCTATGACGGTTTTTG |
| Control shRNA Reverse        | AATTCAAAAACCGTCATAGCGATAACGAGTTCTCGAGAACTCGTTATCGCTATGACGG |
| shPHD3 #1 (TRCN0000001048)   | CACCTGCATCTACTATCTGAA                                      |
| shPHD3.2 (TRCN0000001050)    | GTGGCTTGCTATCCGGGAAAT                                      |
| shACC2 #1 (TRCN 0000029031)  | CCGACGAATCACATTCTTGAT                                      |
| shACC2 #2 (TRCN 0000029032)  | CCCAGAACCTCAAGAAATTA                                       |

## SUPPLEMENTARY FIGURE LEGENDS

Figure S1. Nutrient and PHD3-dependent changes in ACC2 proline hydroxylation. Related to Figure 1.

(A) Schematic depicting different fuels examined in nutrient add back assays. After fuel addition, cells were used for ACC2 hydroxylation assay. MEF cells were cultured in high or low glucose for 12 h, then hydroxylation was assessed at the indicated times after re-addition of 10% FBS (B), or 10% dialyzed FBS (C). Proline hydroxylation was detected in ACC2 immunoprecipitates by western blotting using antibodies to pan-proline hydroxylation, compared with ACC or tubulin controls from the input cell lysate. (D) Representative mass spectra identifying the hydroxylated and non-hydroxylated versions of residue P450 in immunoprecipitated ACC2 protein. “b” fragments contain the N-terminal amino acid and are labeled from the N to C terminus. “y” fragments contain the C-terminal amino acid and are labeled from the C to N terminus. (E) Relative abundance of hydroxylation of proline residues on ACC2 immunoprecipitated from MEFs cultured in 5 mM versus 25 mM glucose media (light grey) or control vs. shPHD3 knockdown cells (dark grey). For all comparisons two-tailed t test was used.  $P < 0.05$ . (F-G) Volcano plots demonstrating that 5 mM glucose media (F) or PHD3-depleted MEFs (G) incubated MEFs have statistically significant proline hydroxylation changes compared to control cells. The proline 450 residue, (aa sequence: IGFP(OH)LMIK), was most significantly changed. (H) Immunoprecipitation and western blotting analysis of ACC2 hydroxylation and phosphorylation in the indicated condition. shControl or shPHD3 293T cells were transfected with ACC2, and incubated with 25 mM glucose media or 5 mM glucose media for 4 h. ACC2 proteins were pulled down using antibody against ACC2 and immunoblotted using the indicated antibodies. (I) Immunoblots of ACC2 hydroxylation from MEFs expressing either control shRNA or PHD3 shRNA with or without AICAR. (J) Relative ACC2 expression using mouse  $\beta$ -actin as a reference gene in MEFs expressing shRNA against ACC2, PHD3 or shRNA control ( $n = 4$ ). (K) Relative PHD3 expression using mouse  $\beta$ -actin as a reference gene in MEFs expressing shRNA against ACC2, PHD3 or shRNA control ( $n = 4$ ). (L) PHD3 expression using mouse  $\beta$ -actin as a reference gene in MEFs under high or low nutrient conditions.

Figure S2. PHD3 KO mouse generation. Related to Figure 2.

(A) Gene targeting strategy for Phd3. In the Phd3 locus, exon 2 is flanked by two loxP sites. Exon 2 is deleted by Cre-mediated recombination. S, Sca I; H, Hind III; Neo, neomycin cassette; hatched square, Frt site (flanking the Neo cassette); open triangle, loxP site; arrows 1, 2 and 3. (B) qPCR analyses to confirm the lack of WT mRNA transcripts in PHD3 KO mouse quadriceps. (C) H&E and immunohistochemistry staining of PHD3 in WT or PHD3 KO mice quadriceps muscles. Scale is 1000  $\mu$ m.

Figure S3. PHD3 binds the BC domain of ACC2. Related to Figure 3.

(A) P450 (hydroxylation site, blue) is located in the ACC2 BC domain (green and cyan). S222 (phosphorylation site, red) is located inside of the ACC holoenzyme dimer structure. This model



was generated by superposition of human ACC2 biotin carboxylase domain (PDB: 3JRW) with the entire yeast ACC (PDB: 5CSL). (B) Schematic figure of the domains of ACC2 protein. Posttranslational modifications by AMPK (phosphorylation, red) and PHD3 (hydroxylation, blue) are highlighted. BC, biotin carboxylase domain; BCCP, biotin carboxyl carrier protein domain; CT, carboxyltransferase domain; N-terminus domain contains ATP grasp domain. (C) Immunoprecipitation and western blotting analysis of PHD3 interaction with the BC domain of ACC2. Proteins were expressed in *e. coli*. ACC2 BC domain with GST-tag and PHD3-HA was pulled down using GST-beads for an *in vitro* binding assay, and the precipitates were immunoblotted. (D) *In vitro* binding of PHD3 with the BCCP domain of ACC2 was assessed by immunoprecipitating protein complexes using anti-GST-beads. (E) *In vitro* binding assay of PHD3 interaction with the CT domain using anti-GST-beads. (F) Immunoprecipitation using anti-HA-beads and western blotting analysis of PHD3 interaction with the BC domain of ACC2. *In vitro* binding assay of PHD3 interaction with the BCCP domain (G) or CT domain (H). (I) HEK293T cells were transfected with constructs expressing ACC2 NT-Flag and/or PHD3-HA. Proteins from cell lysates were immunoprecipitated using anti-Flag antibody and the immunoprecipitates were immunoblotted using the indicated antibodies. (J) ACC2 NT-Flag was transfected into HEK293T cells. Cells were incubated in high (25 mM) or low (5 mM) glucose containing media for 8 hr. Proteins in cell lysates were precipitated by anti-Flag antibody and the precipitates were immunoblotted using hydroxyl proline antibodies. (K) ACC2 FL-WT-Flag, ACC2 FL-P450A-Flag, ACC2 FL-S222A-Flag and/or PHD3-HA were transfected into MEFs. Complexes were immunoprecipitated using anti-Flag antibody and proteins were detected by immunoblotting using the indicated antibodies. (L) Immunoprecipitation and western blot analysis in shcontrol or shPHD3 MEFs overexpressing full length WT ACC2 or S222A ACC2. (M-P) *In vitro* hydroxylation assay for PHD3 enzymatic activity with recombinant protein about N-terminus domains of WT ACC2 (M), P450A ACC2 (N), S222A (O), or S222E (P). 2.5  $\mu$ M or 5  $\mu$ M of PHD3 WT, or H196A mutants were added to a reaction with 20  $\mu$ M synthetic peptide and then succinate was measured at the indicated times. Rates were normalized against the No peptide control (n=3). \*P < 0.05.

Figure S4. PHD3 regulation of fat metabolism. Related to Figure 4

(A) Palmitate oxidation in shCon (control) or shPHD3 C2C12 cells using  $^3\text{H}$ -palmitate as a substrate and measuring released  $^3\text{H}_2\text{O}$  as readout for FAO (n=3). (B) Proline hydroxylation was assessed by immunoblotting from anti-ACC2 immunoprecipitates and corresponding whole-cell lysates of shcontrol or shPHD3 C2C12 cells. (C) Heat map depicting metabolite abundance in PHD3 knockdown, AMPK $\alpha$  knockout or non-silencing control MEFs. Volcano plots demonstrating that PHD3 (D) and AMPK depleted MEFs (E) have numerous statistically significant metabolic changes compared to control cells. PHD3 expression (F) or ACC2 expression (G) using B2M as a reference gene in shControl or shPHD3 HEK293T cells. (H) Mitochondrial DNA number was not changed by PHD3 knockdown. mtDNA levels were measured by quantitative PCR of MT-CO $_2$  using human b-actin as a reference gene in shControl or shPHD3 HEK293T cells. Mitochondrial mass of 293T cells (I) or MEFs (J) depleted of PHD3 or control shRNA using MitoTracker Green (n = 5). (K) Basal palmitate-driven oxygen consumption rate (OCR) of shControl or shPHD3 MEFs was measured using a Seahorse Bioscience XF24 Extracellular Flux Analyzer (n = 15 wells). (L) Basal oxygen consumption rate

(OCR) of shControl or shPHD3 MEFs cultured in high or low glucose media was measured using a Seahorse Bioscience XF24 Extracellular Flux Analyzer (n = 15 wells). Matrix-assisted laser desorption/ionization mass spectrometry imaging (MALDI-MSI) of myristoyl-carnitine (m/z 372.310835,  $\Delta$ ppm = 0.2) (M), and stearoyl-carnitine (m/z 428.37286,  $\Delta$ ppm = 1.34) (N) in WT or PHD3 KO mouse quadriceps under fed or fasted conditions. (O) Measured and calculated mass of species detected by MALDI MS (FT-ICR MS so <2 ppm expected). (P) ATP levels were measured in quadriceps tissue lysates in WT or PHD3 KO mice under fed or fasted condition (n=4) using ATP colorimetric assay kit. ATP, ADP and AMP were measured in WT or PHD3 KO mice quadriceps tissues using mass spectrometry. ATP (Q), ADP (R) and AMP (S) levels were measured in fresh frozen quadriceps tissue in the indicated conditions. WT or PHD3 KO mice under fed or fasted condition (n=8). (T) The energy charge formula was calculated through  $([ATP] + [ADP] / 2) / ([ATP] + [ADP] + [AMP])$ .

Figure S5. PHD3 KO mouse muscle characterization. Related to Figure 5

(A) Gene set enrichment analysis of PHD3 indicating its negative connection with fatty acid oxidation and mitochondrial pathways in human muscle dataset (GSE3307). Mitochondrial and fatty acid oxidation pathways are highlighted in green and blue, respectively. The size of dot represents the number of genes in the pathway, and transparency indicates the significance ( $-\log_{10}$  (FDR)) of the enrichment between this pathway and PHD3 expression. (B) PHD3 expression levels in human muscle biopsies in pre-exercise or post-exercise training (GSE111551). Data represent means  $\pm$  SEM. (C) Relative PHD3 expression using mouse beta-actin as a reference gene in WT or PHD3 KO mice quadriceps pre-exercise versus post exercise (n=9). The mRNA levels of MyoD (D) and myoglobin (E) in WT or PHD3 KO mouse quadriceps under fed or fasting conditions (n = 4). \*P < 0.05. (F) Immunofluorescence of Myosin Heavy Chain Type IIA (MYH2) (green), ACC2 (red) and DAPI (blue) in Flox (WT) or PHD3 KO mouse quadriceps under fed and fasted conditions. Scale is 500  $\mu$ m. (G-H) The relative intensity of MYH2 (G) and ACC2 (H) were normalized by the relative intensity of DAPI for each condition. (I) Gene expression using mouse  $\beta$ -actin as a reference gene in WT or PHD3 KO mouse quadriceps (n = 4). (J) Mean whole-body CO<sub>2</sub> analysis in 20 week-old WT or PHD3 KO mice using Comprehensive Lab Animal Monitoring System (CLAMS) (n=9). WT or PHD3 KO mice were subjected to ad libitum feeding for 48 hours, followed by fasting for 16 hours. Mean whole-body oxygen consumption (K) and Respiratory exchange ratio (RER) (L) in WT or PHD3 KO mice under fed and fasted conditions using CLAMS. Data represented means  $\pm$  SEM. \*P < 0.05.

Figure S6. PHD3 KO mice have increased exercise capacity compared to WT littermates. Related to Figure 6.

(A) Schematic of the exercise capacity treadmill experiment. (B) Age-matched mice (20 weeks old) were individually placed in metabolic cages and allowed to acclimate for 48 h before experiments (n = 8 mice per group). Mean whole-body oxygen consumption of both genotypes from the individual performances. (C) Mean whole-body CO<sub>2</sub> during exercise challenge, beginning with mice at rest. (D) RER (VCO<sub>2</sub>/VO<sub>2</sub>). Data represented means  $\pm$  SEM. \*P < 0.05.

(E) Expression of the indicated genes from WT or PHD KO mouse quadriceps pre- or immediately post-exercise. Mouse  $\beta$ -actin was used as a reference gene (n=4). (F) qPCR analyses of WT PHD3 mRNA transcript in WT or PHD3 MCK-Cre KO mouse quadriceps and liver RNA samples. (G) ACC2 immunoprecipitation and western blotting analysis of ACC2 hydroxylation in WT control or PHD3 MCK-Cre KO mice quadriceps.
